# Supplementary material for: Synthesis of Porous Octahedral ZnO/CuO Composites from Zn/Cu-Based MOF-199 and Their Applications in Visible-Light-Driven Photocatalytic Degradation of Dyes
Source: Hindawi journal article supplement (doi:10.1155/2019/5198045), 2019-10-14
Supplement: f1 [file 5198045.f1.docx]

**Table S1.** Thermal properties of Zn-BTC, Cu-BTC and Zn/Cu-BTC

| Material |  | Zn-BTC | Cu-BTC | Zn/Cu-BTC |
| --- | --- | --- | --- | --- |
| First step | weight loss | 23% | 28% | 27% |
| temperature range | 22 oC -400 oC | 22 oC -300 oC | 22 oC -200 oC |
| peak at | 115oC | - | 82.5 oC |
| Second step | weight loss | 42% | 39% | 47% |
| temperature range | 400 oC - 500 oC | 300-470 | 200 oC -500 oC |
| peak at | 472 oC | 327 oC | 334 oC and 387 oC |

**Table S2.** The textural properties of catalysts

| Materials | SBET (m2/g) | Dpore (Ǻ) | Vpore (cm3/g) |
| --- | --- | --- | --- |
| Cu-BTC | 1635.0 | 20.9 | 0.758 |
| Zn-BTC | 3.0 | 35.9 | 0.003 |
| Zn/Cu-BTC | 844.4 | 21.3 | 0.386 |
| CuO | 6.7 | 89.4 | 0.015 |
| ZnO | 3.9 | 36.9 | 0.004 |
| ZnO/CuO | 32.5 | 107.0 | 0.087 |

**Table S3**. Band edge position of CuO, ZnO and ZnO/CuO

|  | Pure CuO | Pure ZnO | ZnO/CuO composite |
| --- | --- | --- | --- |
| CB | -0.43 | -0.15 | - |
| VB | 1.51 | 3.04 | - |
| *Eg* | 1.94 | 3.19 | 2.63 |

**Table S4**. The parameters of isotherms models

| Langmuir isotherms model | | | Freudlich isotherms model | | |
| --- | --- | --- | --- | --- | --- |
| KL (L.mg-1) | Qm (mg L-1) | R2 | KF (L.mg-1) | n | R2 |
| 0.047 | 1.630 | 0.996 | 0.121 | 1.619 | 0.971 |

Langmuir isotherms model in linear form

Frendlich isotherms model in linear form

where *q*e and *q*m are the equilibrium adsorption capacity and monolayer maximum adsorption capacity (mg g-1); *C*e is the equilibrium concentration (mg L-1); *K*L is Langmuir equilibrium constant; *K*F and *n* are Freudlich parameters.


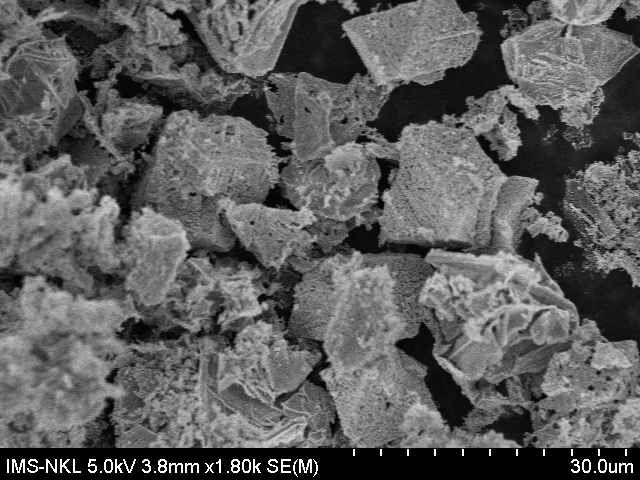

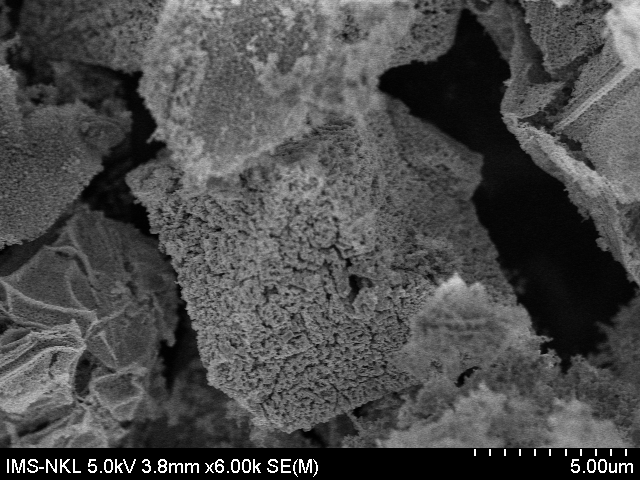


**Figure S1**. SEM observation of CuO derived from Cu-BTC calcined 400oC for 5 h.

| 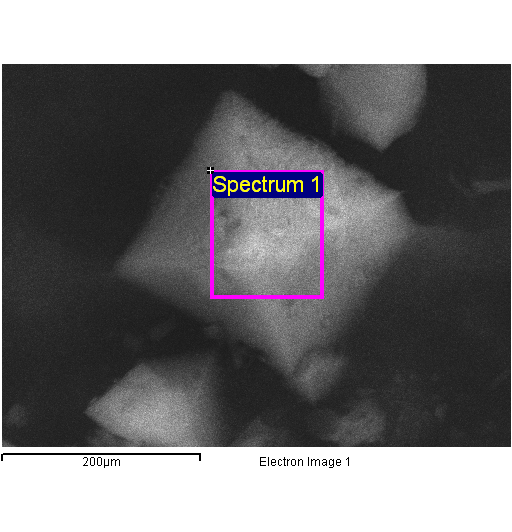 | 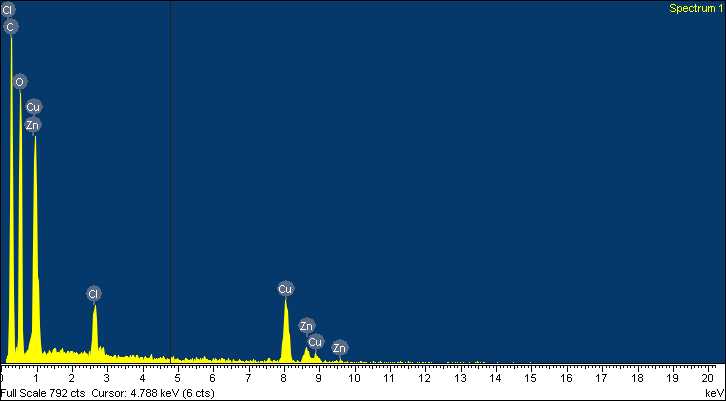 |
| --- | --- |

**Figure S2**. EDX spectrum of ZnO/CuO.

**Figure S3**. The plots of Langmuir isotherms model (a) and Freudlich isotherms model (b).
